# Supplementary material for: Cryptococcal Antigen Screening in Patients Initiating ART in South Africa: A Prospective Cohort Study
Source: PubMed Central journal article supplement (PMC4741358; doi:10.1093/cid/civ936), 2015-11-12

**Supplemental Figure**

**A.** LFA titres in serum/plasma in CrAg positive patients and relationship to LA positivity.

[top] **B.** LFA titres in urine in serum CrAg positive patients and relationship to LA positivity [bottom]

A

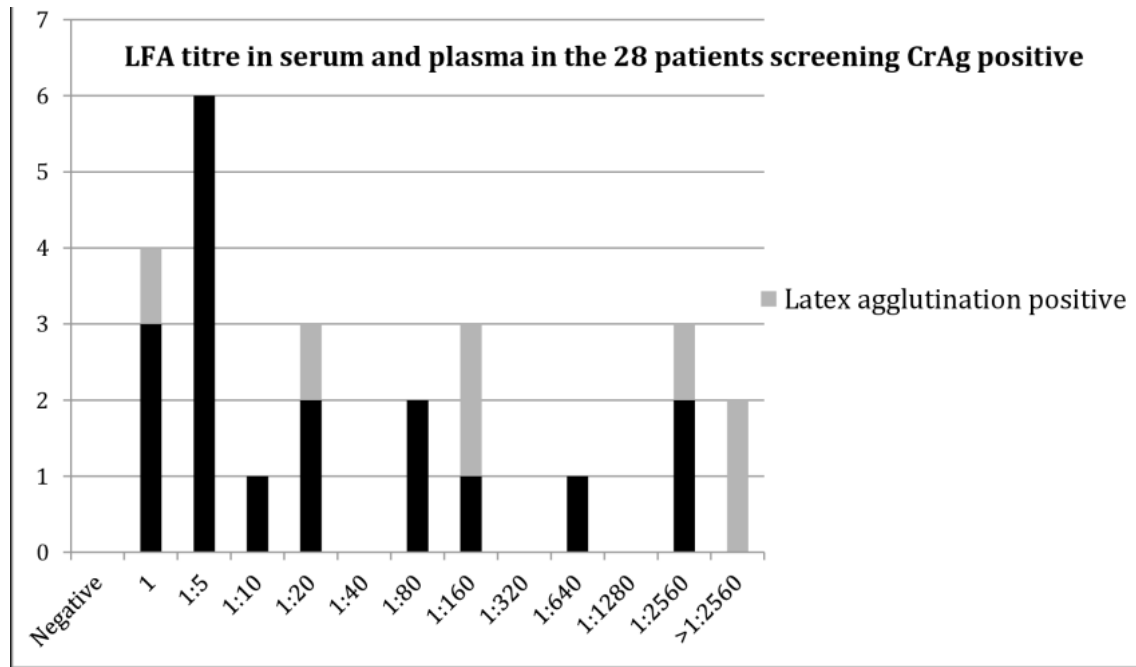

B

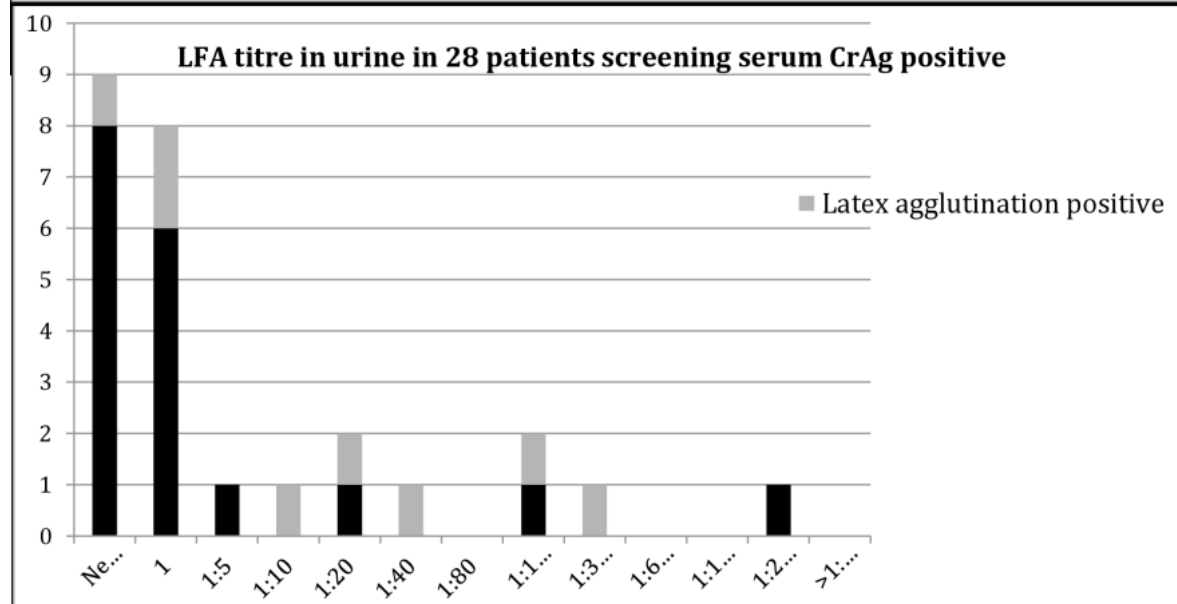

C. LFA titres in the 10 serum CrAg positive patients agreeing to an LP with corresponding CSF LFA and serum / plasma LA results

C

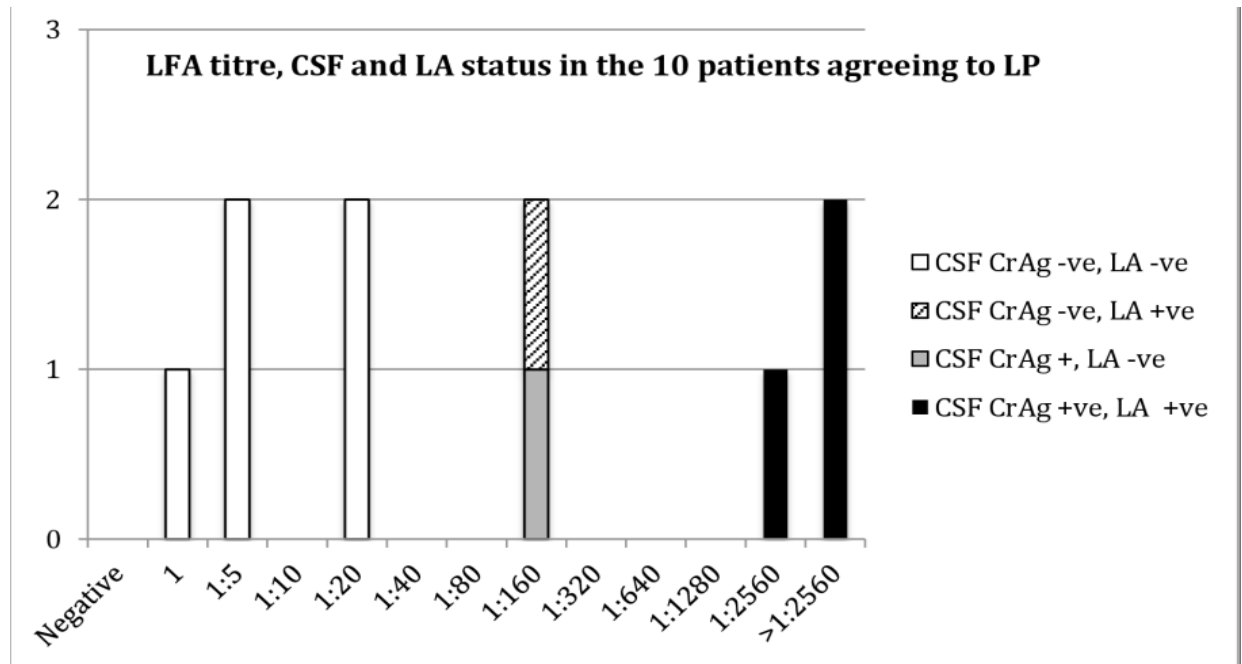

Supplement: supp_civ936_civ936supp_fig.pdf [file supp_civ936_civ936supp_fig.pdf]
