# Supplementary material for: Cryptococcal Antigen Screening in Patients Initiating ART in South Africa: A Prospective Cohort Study
Source: PubMed Central journal article supplement (PMC4741358; doi:10.1093/cid/civ936), 2015-11-12
Supplement: supp_civ936_civ936supp_table.pdf [file supp_civ936_civ936supp_table.pdf]

**Supplemental Table.** Details of deaths in patients screening positive for CrAg

|          | <b>Cause of Death</b>                              | <b>Day of Death</b> | <b>CFS CrAg Result</b> | <b>Antifungal Therapy</b> | <b>Narrative</b>                                                                                                                                                                                         |
|----------|----------------------------------------------------|---------------------|------------------------|---------------------------|----------------------------------------------------------------------------------------------------------------------------------------------------------------------------------------------------------|
| <b>1</b> | Bacterial infection: MRSA                          | 85                  | Positive               | AmB induction             | Widespread erythroderma, lung abscess and bacteremia. Self-discharged from hospital prior to completion of antimicrobials                                                                                |
| <b>2</b> | Bacterial infection: Nosocomial pneumonia          | 21                  | Positive               | AmB induction             | Admitted with disseminated TB, renal and hepatic impairment. Improvement of CM and TB. Developed nosocomial pneumonia and died despite appropriate antibiotics                                           |
| <b>3</b> | Unknown/possible CM IRIS                           | 33                  | Positive               | AmB induction             | Uncomplicated CM treated with 2 weeks IV AmB. 1 week post discharge developed gastroenteritis. Manage at home with ORS and fully recovered. Died at home on day 12 ART, no preceding headache or illness |
| <b>4</b> | Right upper lobe pneumonia and acute renal failure | 27                  | Negative               | Fluconazole               | Developed ATN secondary to sepsis and tenofovir.                                                                                                                                                         |
| <b>5</b> | Metastatic adenocarcinoma of the colon             | 112                 | Not Done               | Fluconazole               | Multiple bone and liver metastases                                                                                                                                                                       |
| <b>6</b> | Disseminated TB                                    | 2                   | Not Done               | Fluconazole               | Admitted on day of screening with smear positive rifampicin sensitive disseminated TB.                                                                                                                   |
| <b>7</b> | Cryptococcal Meningitis                            | 53                  | Not done               | Nil                       | Screened CrAg positive with LFA prior to FDA approval and negative with the LA. Defaulted clinic and did not start ART. Admitted with and died of CM.                                                    |

**Supplemental Table.** Details of deaths in patients screening positive for CrAg
